# Supplementary material for: Comprehensive analysis of properties of green diesel enhanced by fatty acid methyl esters
Source: Royal Society of Chemistry journal article supplement (doi:10.1039/d3ra06492a), 2023-01-01
Supplement: d3ra06492a1.pdf [file d3ra06492a1.pdf]

## Supplementary Material

หมายเลขตัวอย่าง ผวคNS0643/65

ชื่อตัวอย่าง Bio-Hydrogenated Diesel (BHD)

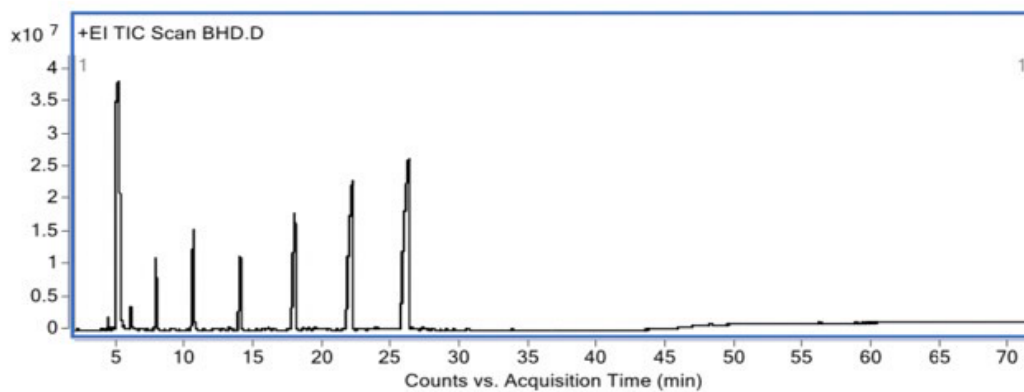

**Figure S1** GC/MS full scan of bio-hydrogenated diesel (BHD)

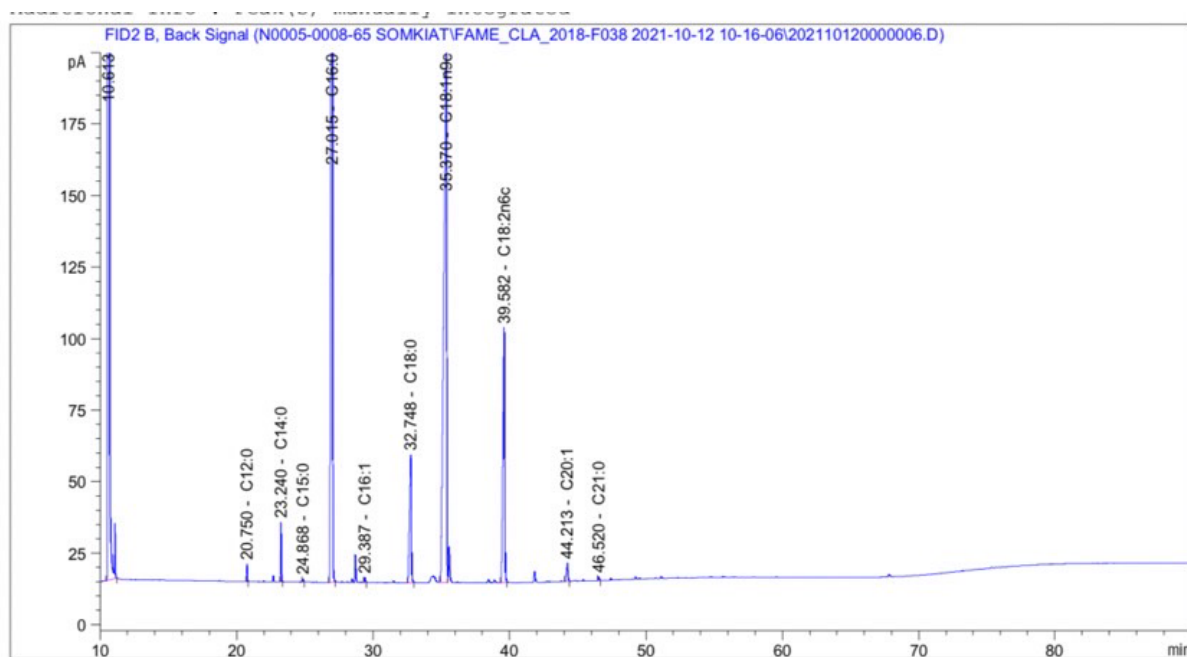

**Figure S2** GC/MS full scan of fatty acid methyl esters (FAME)

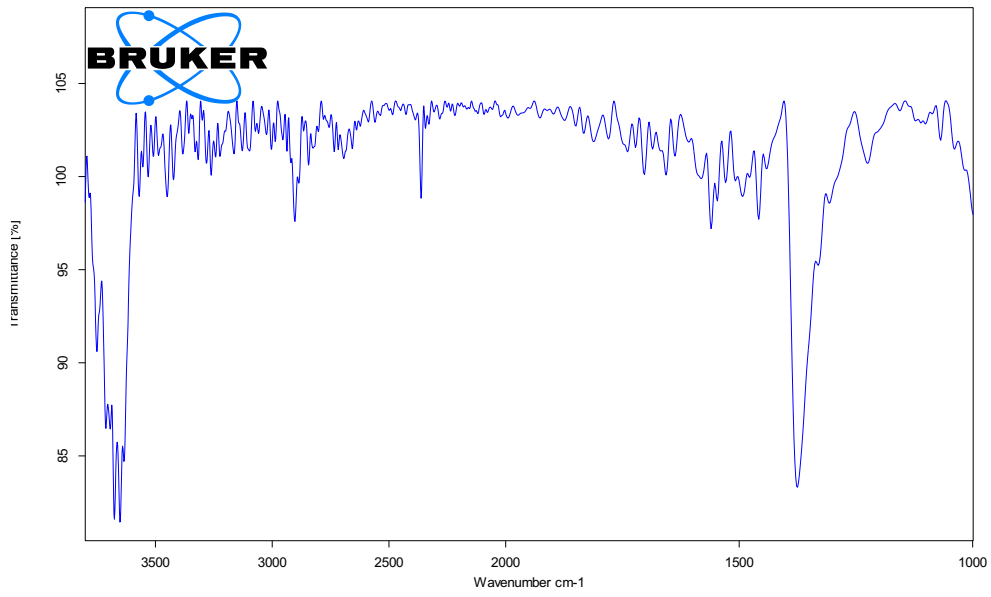

**Figure S3** FT-IR spectra across the worn surface on the disc for the pure BHD

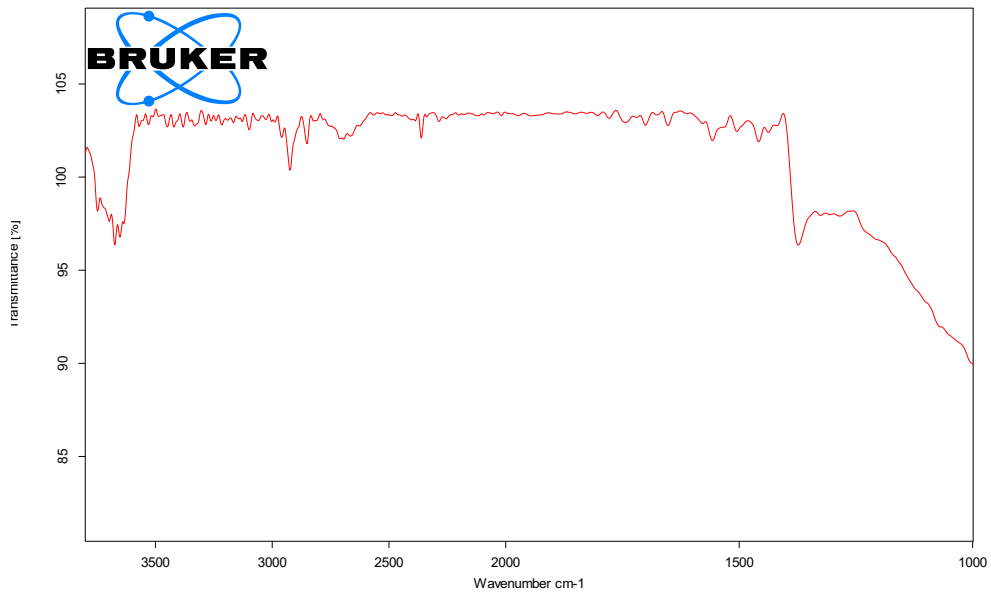

**Figure S4** FT-IR spectra across the worn surface on the disc for the blended fuels of  
5% FAME in BHD

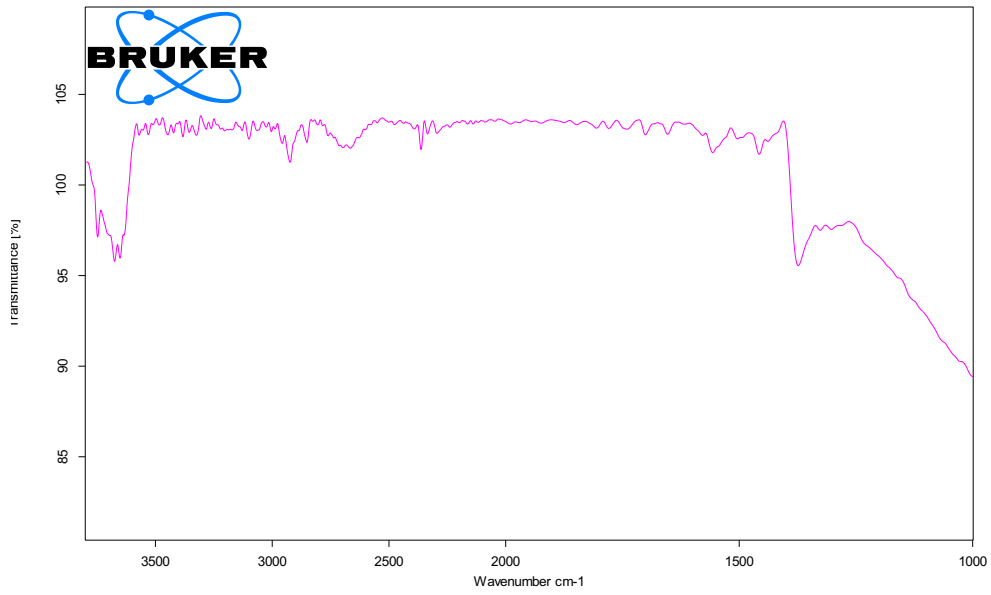

**Figure S5** FT-IR spectra across the worn surface on the disc for the blended fuels of  
10% FAME in BHD

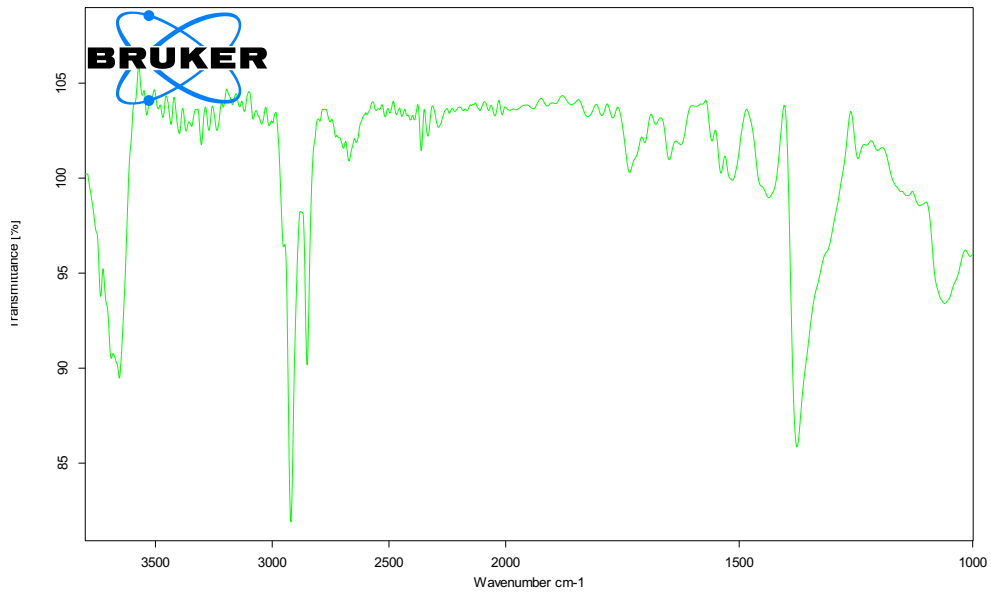

**Figure S6** FT-IR spectra across the worn surface on the disc for the blended fuels of  
50% FAME in BHD

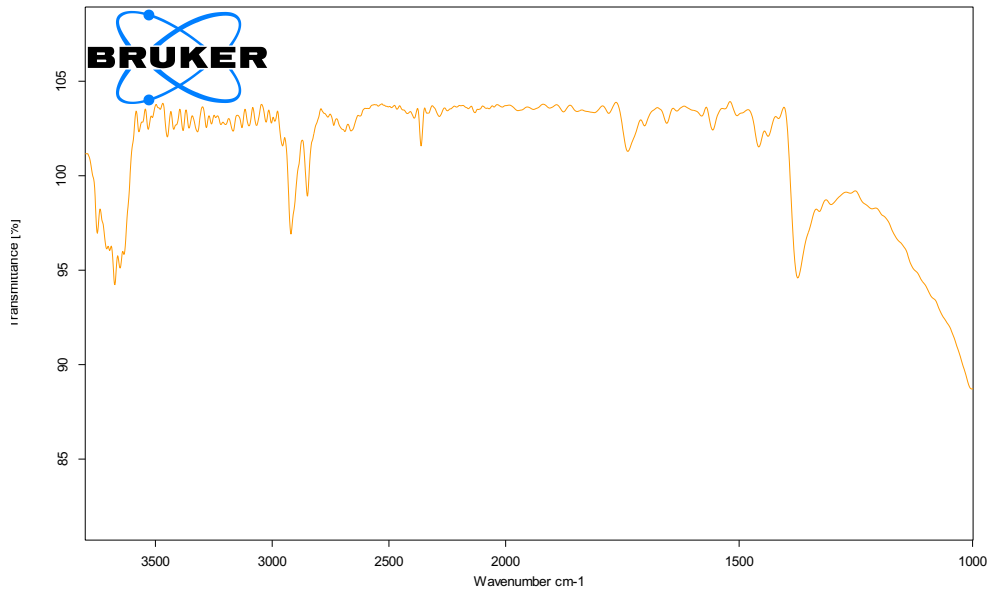

**Figure S7** FT-IR spectra across the worn surface on the disc for pure FAME
